# Supplementary material
Source: MDPI journal article supplement (https://www.mdpi.com/2073-4441/15/1/137)
Supplement: s1 [file s1]

# Supplementary materials

## PFAS in the drinking water source: analysis of the contamination levels, origin and emission rates

**Dauren Mussabek <sup>1,2,\*</sup>, Anna Söderman <sup>1</sup>, Tomomi Imura <sup>2</sup>, Kenneth M Persson <sup>1,3,4</sup>, Kei Nakagawa <sup>2</sup>, Lutz Ahrens <sup>5</sup> and Ronny Berndtsson <sup>1,6</sup>**

<sup>1</sup> Division of Water Resources Engineering, Lund University, Lund, Sweden

<sup>2</sup> Institute of Integrated Science and Technology, Nagasaki University, Nagasaki, Japan

<sup>3</sup> Sweden Water Research AB, Lund, Sweden

<sup>4</sup> South Sweden Water Supply AB (Sydvatten AB), Malmö, Sweden

<sup>5</sup> Department of Aquatic Sciences and Assessment, Swedish University of Agricultural Sciences (SLU), Uppsala, Sweden

<sup>6</sup> Centre for Advanced Middle Eastern Studies (CMES), Lund University, Lund, Sweden

\* Correspondence: dauren.mussabek@tvrl.lth.se; Tel.: +46462229470.

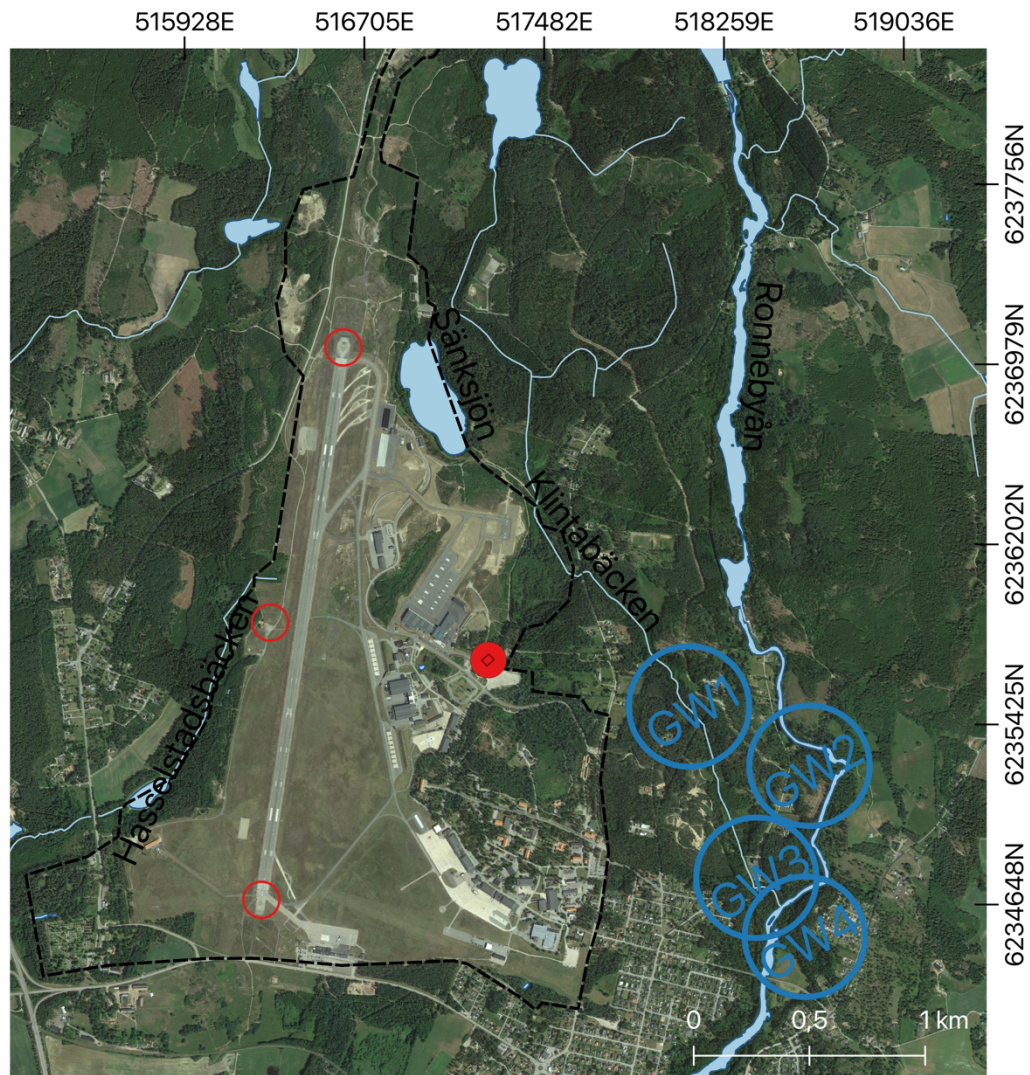

- |                       |                       |
|-----------------------|-----------------------|
| Airfield territory    | GW extraction points  |
| PFAS emission sources | Approximate locations |
| Unconfirmed sources   | Surface water bodies  |
| FTF                   | Stream/creek          |
|                       | Lake/pond/river       |

Figure S1. Study area description, including: airfield territory, PFAS emission sources, surface water bodies and groundwater extraction locations (exact locations were approximated for security reasons); basemap sources: Google Satellite data and GSD Lantmateriet; CRS: SWEREF99 TM.

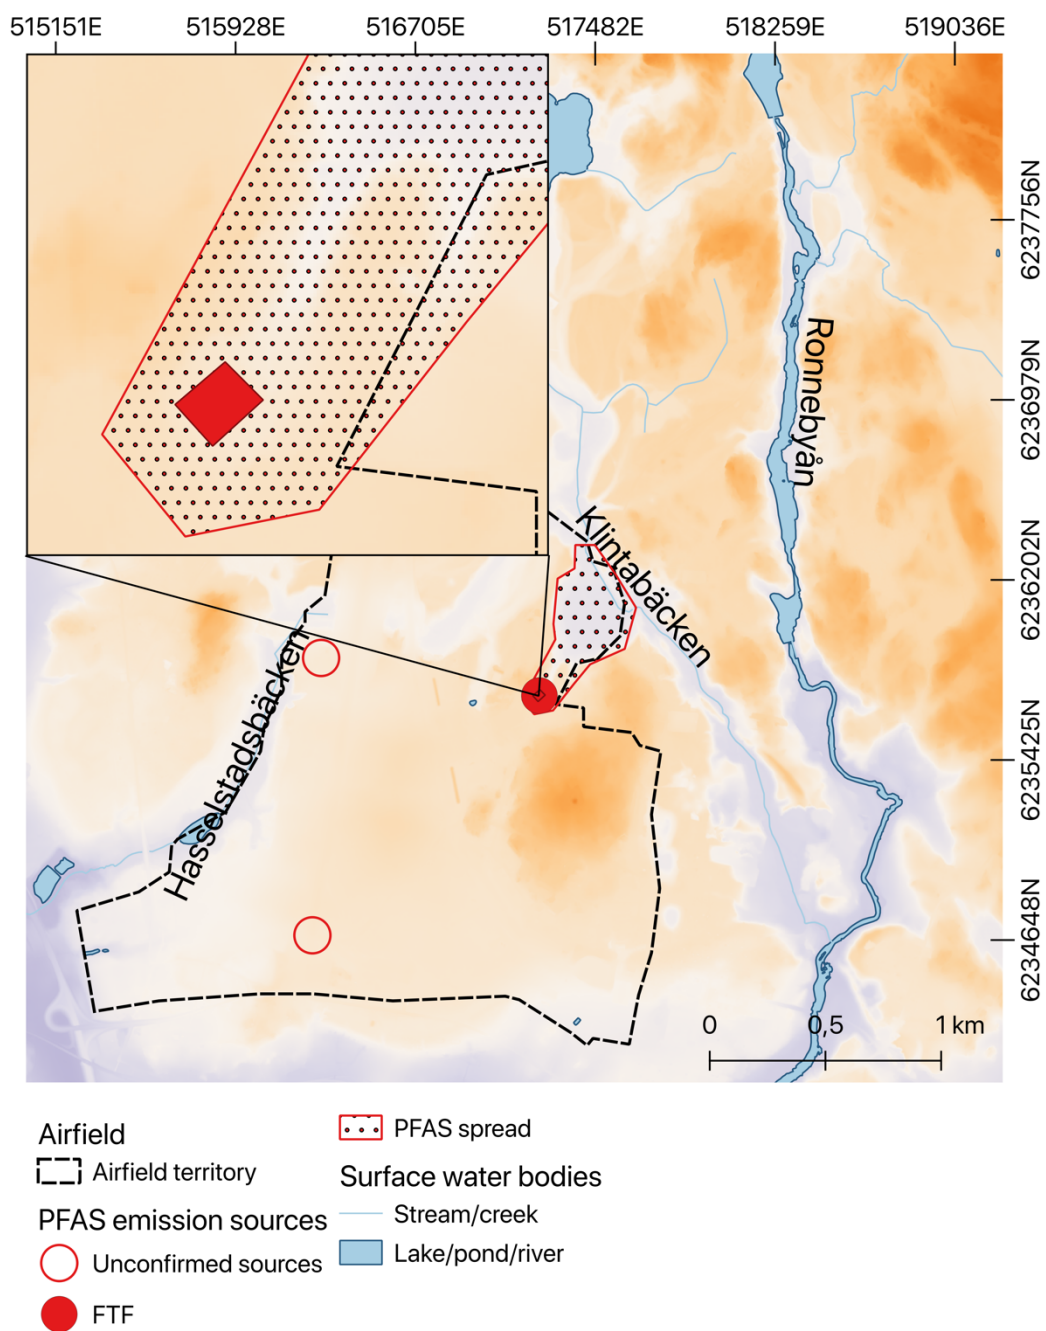

Figure S2. Topography of the studied area, including: airfield territory, surface water bodies, PFAS emission sources and spread area; basemap sources: GSD Lantmateriet and Geodata Lantmateriet; CRS: SWEREF99 TM.

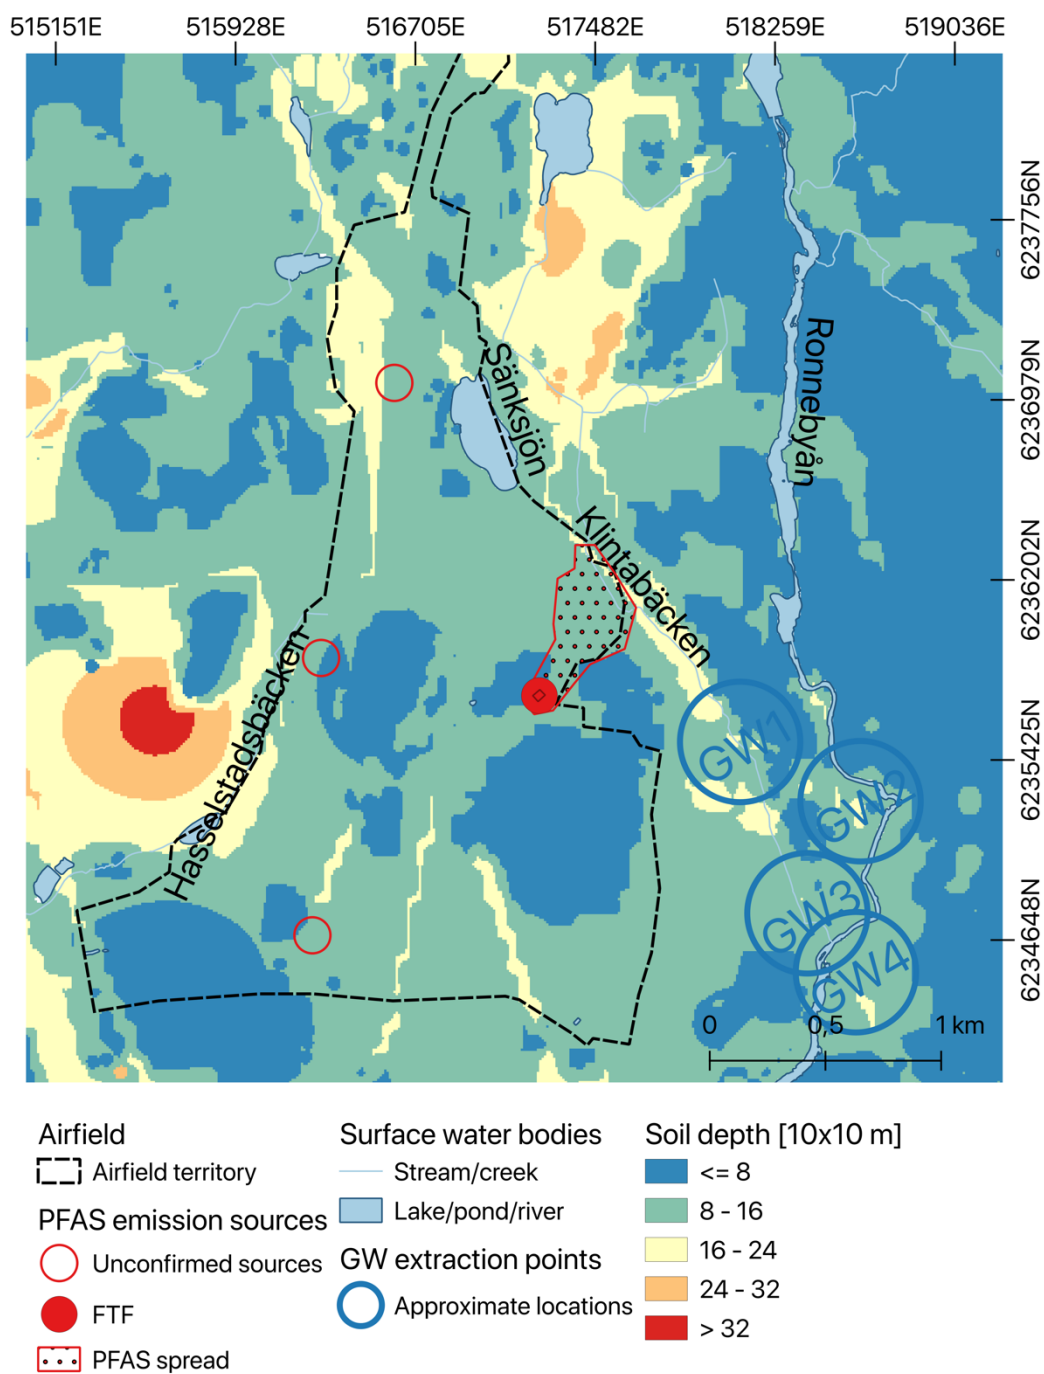

Figure S3. Description of the soil layer depth at the studied area, including: airfield territory, PFAS emission sources and spread area, surface water bodies and groundwater extraction locations (exact locations were approximated for security reasons); basemap sources: GSD Lantmateriet and Geodata Lantmateriet; CRS: SWEREF99TM.



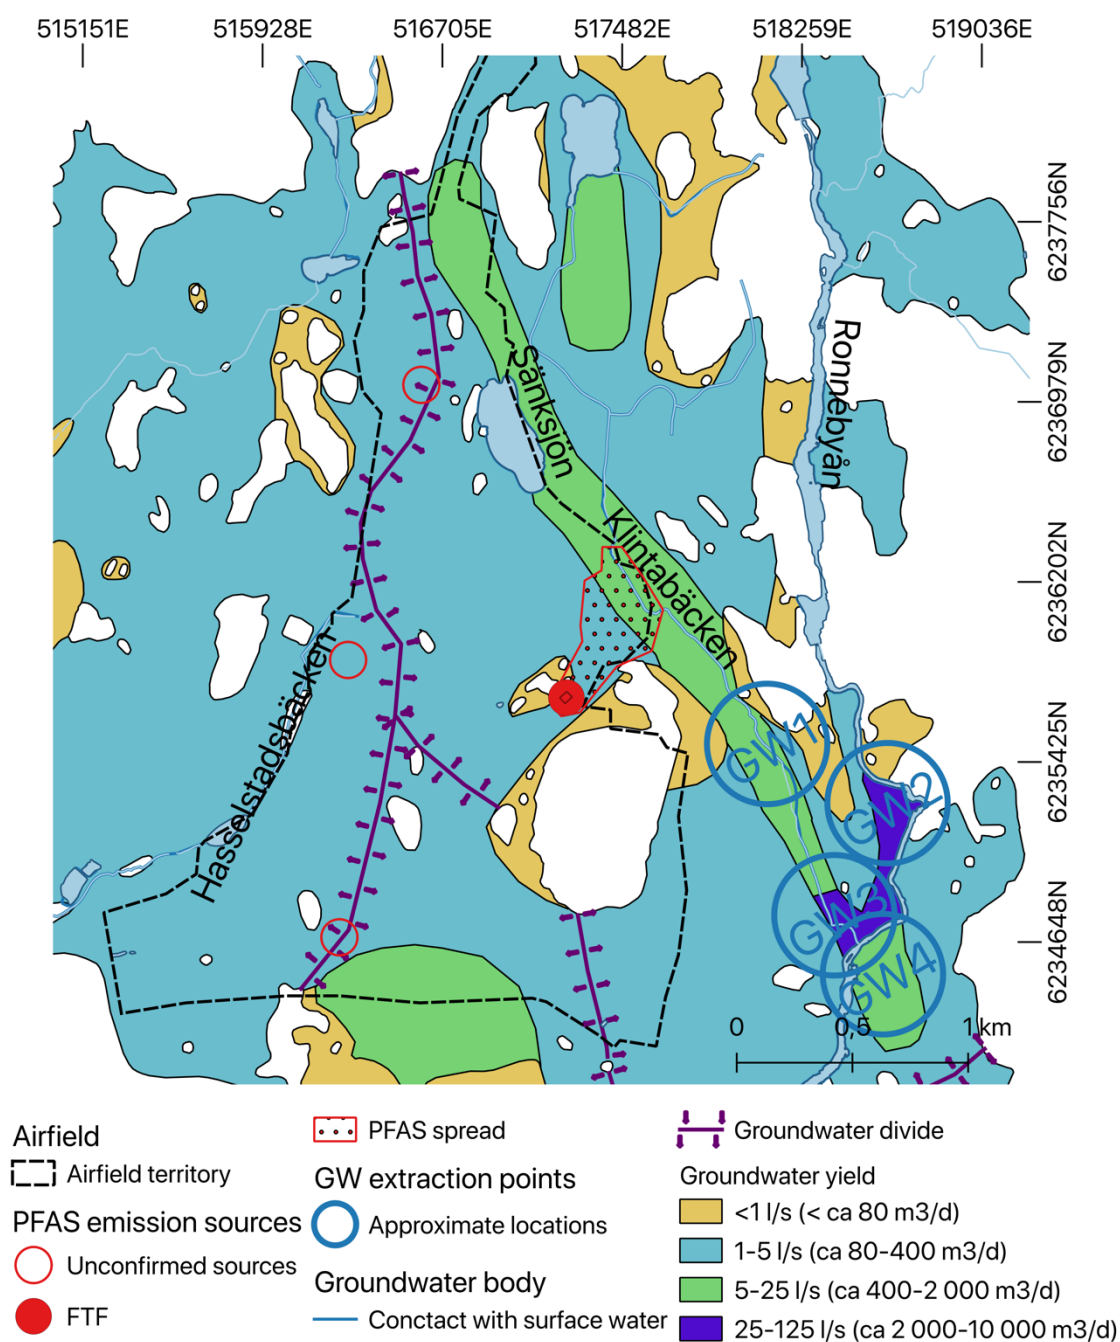

Figure S4. Hydrogeology of the studied area, including: airfield territory, PFAS emission sources and spread area, surface water bodies and groundwater extraction locations (exact locations were approximated for security reasons), groundwater confinement and capacities; basemap sources: GSD Lantmäteriet and Geological Survey of Sweden; CRS: SWEREF99TM.

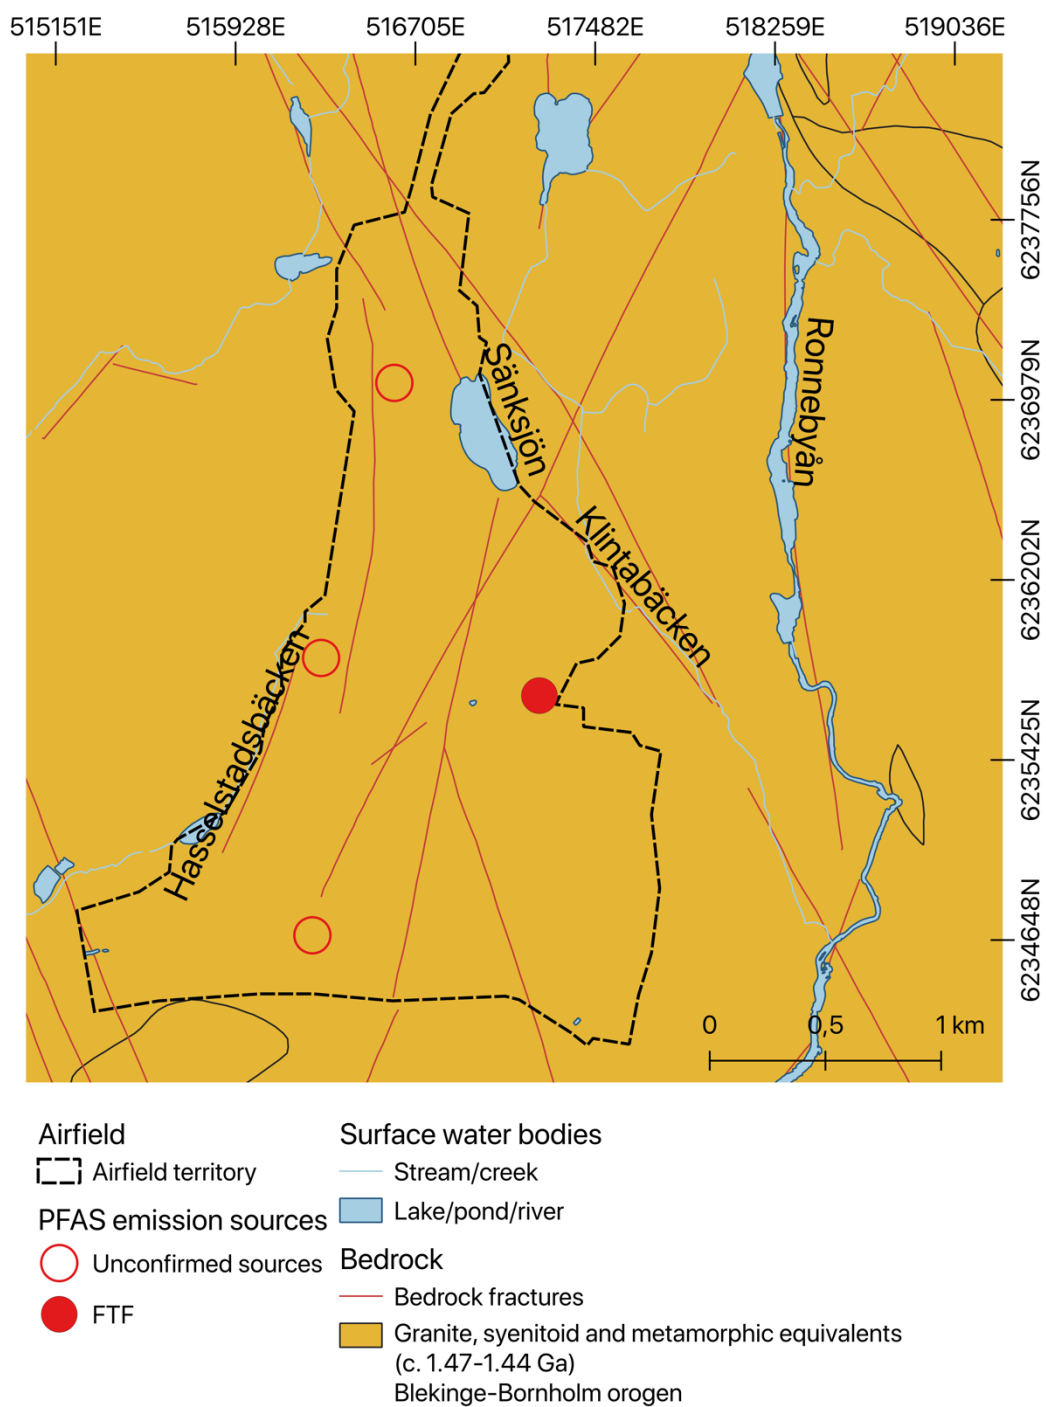

Figure S5. Bedrock lithology at the studied area, including: airfield territory, PFAS emission sources and surface water bodies; basemap sources: GSD Lantmateriet and Geological Survey of Sweden; CRS: SWEREF99TM.

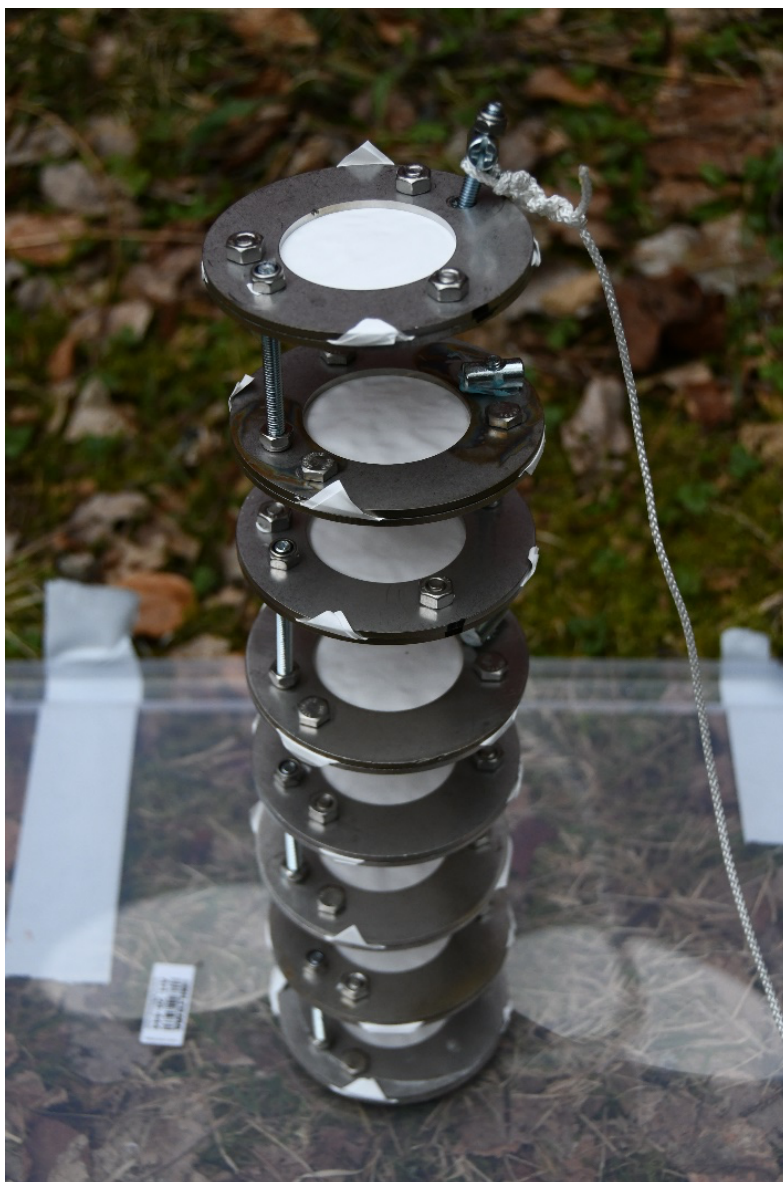

Figure S6. Photo of the POCIS prior to deployment into the groundwater well.

Table S1. PFAS concentrations measured in triplicate groundwater samples collected from groundwater extraction wells corresponding to GW1, GW3 and GW4 (see Figure S1).

| Sample | Individual PFAS concentrations ng L <sup>-1</sup> * |       |       |      |       |       |      |      |        |          |          |      | Σ PFAS |
|--------|-----------------------------------------------------|-------|-------|------|-------|-------|------|------|--------|----------|----------|------|--------|
|        | PFBS                                                | PFHxS | PFOS  | PFDS | PFHpA | PFHxA | PFOA | PFNA | PFOcDA | 6:2 FTSA | 8:2 FTSA | FOSA |        |
| GW4    | <1                                                  | 5.1   | 5.3   | <5   | <5    | <10   | <5   | <5   | <10    | <10      | <1       | 5.3  | 16     |
|        | <1                                                  | 5.4   | 6     | <5   | <5    | <10   | <5   | <5   | <10    | <10      | <1       | 5.4  | 17     |
|        | <1                                                  | 5.2   | 5.8   | <5   | <5    | <10   | <5   | <5   | <10    | <10      | <1       | 5.5  | 17     |
| GW3    | 190                                                 | 1400  | 2000  | <5   | 86    | 280   | 260  | <5   | <10    | <10      | <1       | 5.7  | 4200   |
|        | 200                                                 | 1400  | 2000  | <5   | 82    | 290   | 260  | <5   | <10    | <10      | <1       | 5.7  | 4200   |
|        | 180                                                 | 1400  | 2100  | <5   | 82    | 280   | 250  | <5   | <10    | <10      | <1       | 6.7  | 4300   |
| GW1    | 340                                                 | 3600  | 14000 | <5   | 140   | 640   | 350  | <5   | <10    | 36       | 6.1      | 80   | 19000  |
|        | 390                                                 | 4300  | 16000 | <5   | 150   | 720   | 390  | 8.8  | 12     | 41       | 5.5      | 93   | 22000  |
|        | 390                                                 | 3700  | 13000 | 9.7  | 130   | 690   | 340  | <5   | 46     | 36       | 5.9      | 82   | 18000  |

\*) "<x" corresponds to concentrations below the instrumental detection limit (iLOD).



Table S2. PFAS detected in POCIS and corresponding PFAS concentrations estimated for groundwater measured at GW3 and GW1 (see Figure S1).

| Deployment                                                                                        |               | Individual PFAS detected in POCIS |       |       |       |       |        |       |         |         |        |        |        |        |        |          |          |
|---------------------------------------------------------------------------------------------------|---------------|-----------------------------------|-------|-------|-------|-------|--------|-------|---------|---------|--------|--------|--------|--------|--------|----------|----------|
| Location                                                                                          | Period [days] | PFPeA                             | PFHxA | PFHpA | PFOA  | PFNA  | PFDA   | PFBS  | L-PFHxS | B-PFHxS | L-PFOS | B-PFOS | L-FOSA | B-FOSA | MeFOSA | 6:2 FTSA | 8:2 FTSA |
|                                                                                                   |               | Rs [L day <sup>-1</sup> ] *       |       |       |       |       |        |       |         |         |        |        |        |        |        |          |          |
|                                                                                                   |               | 0.0046                            | 0.029 | 0.035 | 0.061 | 0.077 | 0.04   | 0.028 | 0.046   | 0.046   | 0.088  | 0.088  | 0.1    | 0.1    | 0.1    | 0.046    | 0.088    |
| PFAS concentrations in water corresponding to accumulated in POCIS sorbent [ ng L <sup>-1</sup> ] |               |                                   |       |       |       |       |        |       |         |         |        |        |        |        |        |          |          |
| GW3                                                                                               | 28            | 67                                | 64    | 12    | 27    | 0.066 | 0.063  | 65    | 150     | 48      | 39     | 44     | -      | -      | -      | -        | -        |
|                                                                                                   | 28            | 110                               | 76    | 15    | 34    | 0.074 | 0.075  | 75    | 180     | 63      | 62     | 78     | -      | -      | -      | -        | -        |
|                                                                                                   | 28            | 98                                | 48    | 8.3   | 20    | 0.054 | 0.074  | 45    | 120     | 43      | 29     | 30     | -      | -      | -      | -        | -        |
|                                                                                                   | MEAN          | 92                                | 63    | 12    | 27    | 0.065 | 0.071  | 62    | 150     | 51      | 43     | 51     | -      | -      | -      | -        | -        |
|                                                                                                   | SD            | 22                                | 14    | 3.4   | 7     | 0.01  | 0.0067 | 15    | 30      | 10      | 17     | 25     | -      | -      | -      | -        | -        |
| GW1                                                                                               | 7             | 150                               | 200   | 32    | 54    | 0.35  | 0.3    | 150   | 620     | 170     | 140    | 150    | 1.7    | 0.72   | -      | 13       | 0.33     |
|                                                                                                   | 7             | 88                                | 170   | 30    | 51    | 0.35  | 0.2    | 110   | 500     | 140     | 150    | 160    | 2      | 0.74   | -      | 12       | 0.19     |
|                                                                                                   | 14            | 150                               | 190   | 34    | 63    | 0.35  | 0.19   | 170   | 740     | 230     | 330    | 420    | 3.5    | 1.3    | -      | 17       | 0.31     |
|                                                                                                   | 14            | 210                               | 190   | 25    | 57    | 0.37  | 0.16   | 150   | 680     | 230     | 360    | 430    | 3.3    | 1.4    | -      | 15       | 0.31     |
|                                                                                                   | 21            | 88                                | 150   | 27    | 49    | 0.34  | 0.16   | 120   | 550     | 180     | 390    | 550    | 4.4    | 1.4    | -      | 15       | 0.31     |
|                                                                                                   | 21            | 140                               | 160   | 25    | 48    | 0.32  | 0.27   | 120   | 560     | 210     | 360    | 470    | 3.7    | 1.3    | -      | 14       | 0.32     |
|                                                                                                   | 28            | 99                                | 170   | 31    | 54    | 0.35  | 0.25   | 120   | 640     | 230     | 530    | 800    | 5      | 1.6    | 0.02   | 16       | 0.35     |
|                                                                                                   | 28            | 140                               | 160   | 21    | 44    | 0.31  | 0.18   | 110   | 480     | 170     | 440    | 610    | 5.2    | 1.4    | 0.026  | 14       | 0.31     |
|                                                                                                   | MEAN          | 130                               | 170   | 28    | 53    | 0.34  | 0.21   | 130   | 600     | 200     | 340    | 450    | 3.6    | 1.2    | -      | 15       | 0.3      |
|                                                                                                   | SD            | 41                                | 18    | 4.4   | 5.9   | 0.019 | 0.053  | 22    | 90      | 35      | 130    | 220    | 1.3    | 0.32   | -      | 1.6      | 0.048    |

$Rs = C_{\text{sorbent}} * m_{\text{sorbent}} (C_{\text{water}} * \text{time})^{-1}$  (product of concentration of compound in adsorbent [ng g<sup>-1</sup>] and mass of adsorbent [g] divided by product of water concentration [ng L<sup>-1</sup>] and time [days] (Gobelius et al., 2019)).

Table S3. Example of analysed PFAS compositions corresponding to PFAS-AFFF reported for US market (grey) and measured PFAS concentrations and relative composition in PFAS-AFFF reported for on Swedish market\*

| AFFF product           | Individual PFAS |            |            |           |           |           |       |       |       |      | 10:2 FTSA   | 8:2 FTSA   | 6:2 FTSA   | 4:2 FTSA   | Period in use   |
|------------------------|-----------------|------------|------------|-----------|-----------|-----------|-------|-------|-------|------|-------------|------------|------------|------------|-----------------|
|                        | PFBA            | PFPeA      | PFHxA      | PFHpA     | PFOA      | PFDA      | PFBS  | PFHxS | PFHpS | PFOS |             |            |            |            |                 |
| 3M                     | ?               | ?          | ?          | ?         | ?         | ?         | PFBS* | PFHxS | PFHpS | PFOS |             |            |            |            | 1980s - 2008    |
| National Foam          |                 |            |            |           |           |           |       |       |       |      | 10:2 FTSA** | 8:2 FTSA** | 6:2 FTSA** | 4:2 FTSA** |                 |
| Ansul                  |                 |            |            |           |           |           |       |       |       |      |             | 8:2 FTSA** | 6:2 FTSA** |            |                 |
| Angus                  |                 |            |            |           |           |           |       |       |       |      | 10:2 FTSA** | 8:2 FTSA** | 6:2 FTSA** |            |                 |
| Chemguard              |                 |            |            |           |           |           |       |       |       |      | 10:2 FTSA** | 8:2 FTSA** | 6:2 FTSA** |            |                 |
| Fire Service Plus      |                 |            |            |           |           |           |       |       |       |      | 10:2 FTSA** | 8:2 FTSA** | 6:2 FTSA** | 4:2 FTSA** | 1980s - Present |
| OneSeven B-AR          | 1500            | 1100       | 500        | 100       |           |           |       |       |       |      | ?           | ?          | 2400       | ?          |                 |
|                        | <b>27%</b>      | <b>20%</b> | <b>9%</b>  | <b>2%</b> |           |           |       |       |       |      |             |            | <b>43%</b> |            |                 |
| ARC Miljö              | 600             | 100        | 1100       |           |           |           |       |       |       |      | ?           | ?          | 4400       | ?          |                 |
|                        | <b>10%</b>      | <b>2%</b>  | <b>18%</b> |           |           |           |       |       |       |      |             |            | <b>71%</b> |            |                 |
| Towalex AFFF-AR 3x3    | 1000            | 600        | 9800       | 100       | 200       | 100       |       |       |       |      | ?           | ?          | 8100       | ?          |                 |
|                        | <b>5%</b>       | <b>3%</b>  | <b>49%</b> | <b>1%</b> | <b>1%</b> | <b>1%</b> |       |       |       |      |             |            | <b>41%</b> |            |                 |
| Towalex AFFF 3% Master | 1100            | 600        | 10400      | 200       | 300       | 100       |       |       |       |      | ?           | ?          | 4100       | ?          |                 |
|                        | <b>7%</b>       | <b>4%</b>  | <b>62%</b> | <b>1%</b> | <b>2%</b> | <b>1%</b> |       |       |       |      |             |            | <b>24%</b> |            |                 |
| Sthamex AFFF-P 3%      | 100             |            | 100        |           |           |           |       |       |       |      | ?           | ?          | 9500       | ?          |                 |
|                        | <b>1%</b>       |            | <b>1%</b>  |           |           |           |       |       |       |      |             |            | <b>98%</b> |            |                 |

\*) reported PFAS compositions and concentrations might not fully represent the actual PFAS composition in PFAS-AFFF; \*\*) corresponds to individual PFAS with functional group other than stated (Rupert et al., 2005; Place and Field, 2012; KEMI, 2015; Kärrman et al., 2016).

## References:

- Gobelius, L.; Persson, C.; Wiberg, K.; Ahrens, L. Calibration and application of passive sampling for per- and polyfluoroalkyl substances in a drinking water treatment plant. *J. Hazard Mater.* **2019**, 362, 230–237. <https://doi.org/10.1016/j.jhazmat.2018.09.005>.
- Kärrman, A.; Bjurlid, F.; Hagberg, J.; Ricklund, N.; Larsson, M.; Stubleski, J.; Hollert, H. Study of Environmental and Human Health Impacts of Firefighting Agents; Technical Report; MTM Research Centre, Örebro University: Örebro, Sweden, 2016.
- KEMI, Kemikalieinspektionen. Chemical Analysis of Selected Fire-fighting Foams on the Swedish Market 2014; Swedish Chemicals Agency, 2015.
- Place, B.J., Field, J.A., 2012. Identification of Novel Fluorochemicals in Aqueous Film-Forming Foams Used by the US Military *Environ. Sci. Technol.* **2012**, 46, 7120–7127. <https://doi.org/10.1021/es301465n>.
- Rupert, W.; Verdonik, D.; Hanauska, C. Environmental Impacts of Fire Fighting Foams; Hughes Associates, Inc., Baltimore, MD USA, 2005.
